# Supplementary material
Source: publisher figshare collection journal article supplement (https://gsajournals.figshare.com/ndownloader/files/15041081)

**Supplementary Fig. S2.** Relationship between number of input reads and number of output *ustacks* loci across nine female and eleven male hellbenders (white and black points, respectively).

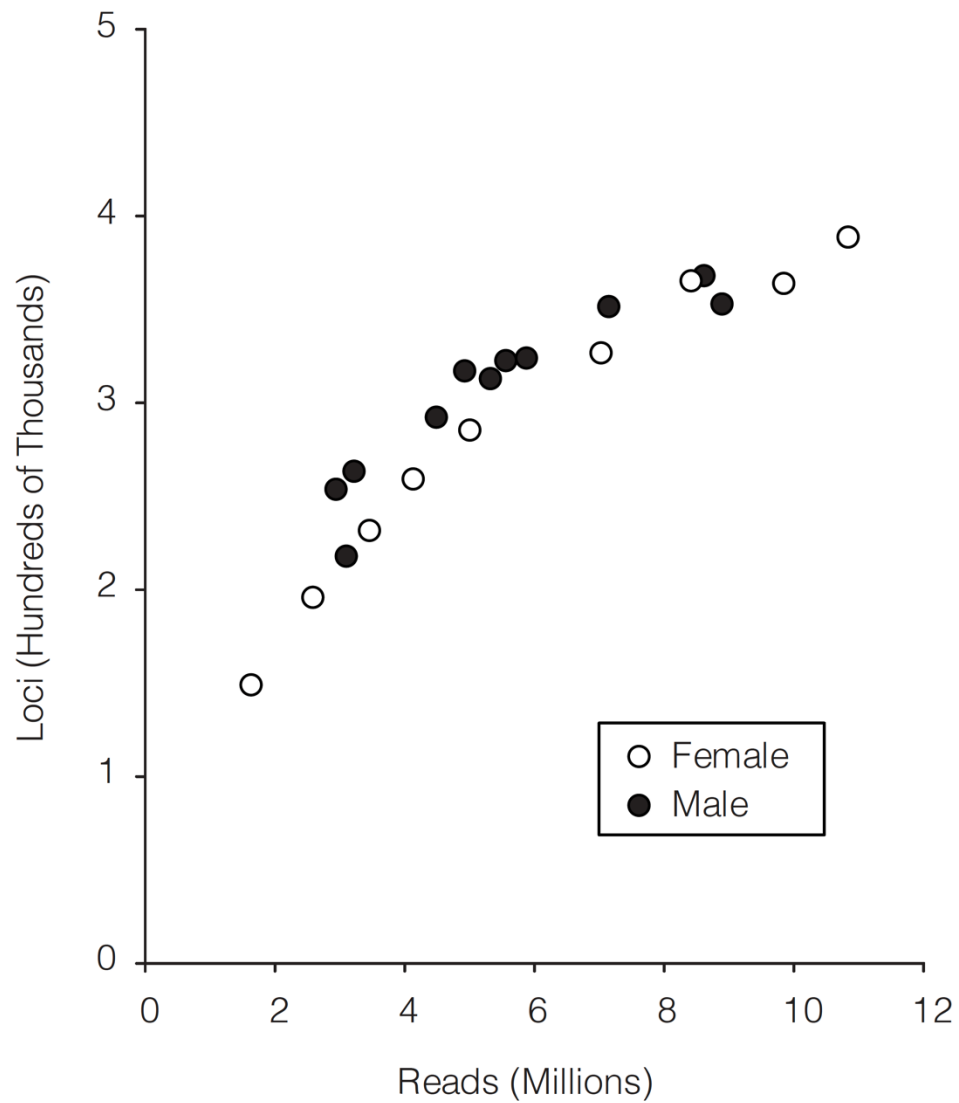

Supplement: Supplementary file 1 [file 15041081]
